# Supplementary material for: LRRC8A-containing chloride channel is crucial for cell volume recovery and survival under hypertonic conditions
Source: PubMed Central journal article supplement — Proc Natl Acad Sci U S A. 2021 Jun 3;118(23):e2025013118. doi: 10.1073/pnas.2025013118 (PMC8201826; doi:10.1073/pnas.2025013118), 2021-06-03
Supplement: pnas.2025013118.sapp.pdf [file pnas.2025013118.sapp.pdf]

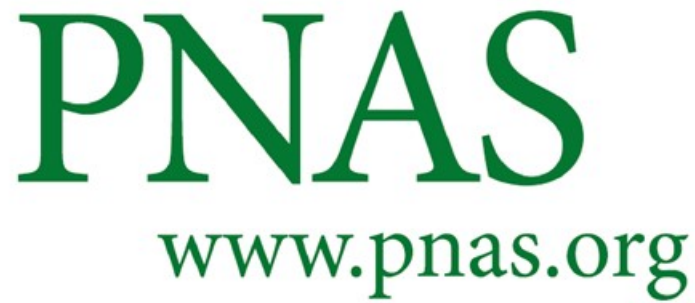

**Supplementary Information for Revised PNAS manuscript MS# 2020-25013RR**

**LRRC8A-containing chloride channel is crucial for cell volume recovery and survival under hypertonic conditions**

Selma A. Serra, Predrag Stojakovic, Ramon Amat, Fanny Rubio-Moscardo, Pablo Latorre, Gerhard Seisenbacher, David Canadell, René Böttcher, Michael Aregger, Jason Moffat, Eulàlia de Nadal, Miguel A. Valverde and Francesc Posas

Correspondence to: [eulalia.nadal@irbbarcelona.org](mailto:eulalia.nadal@irbbarcelona.org); [miguel.valverde@upf.edu](mailto:miguel.valverde@upf.edu) and [francesc.posas@irbbbrcelona.org](mailto:francesc.posas@irbbbrcelona.org)

**This PDF file includes:**

Figs. S1 to S10  
Tables S1 and S2

**Other supplementary materials for this manuscript include the following:**

Tables S3 and S4 (Datasets)

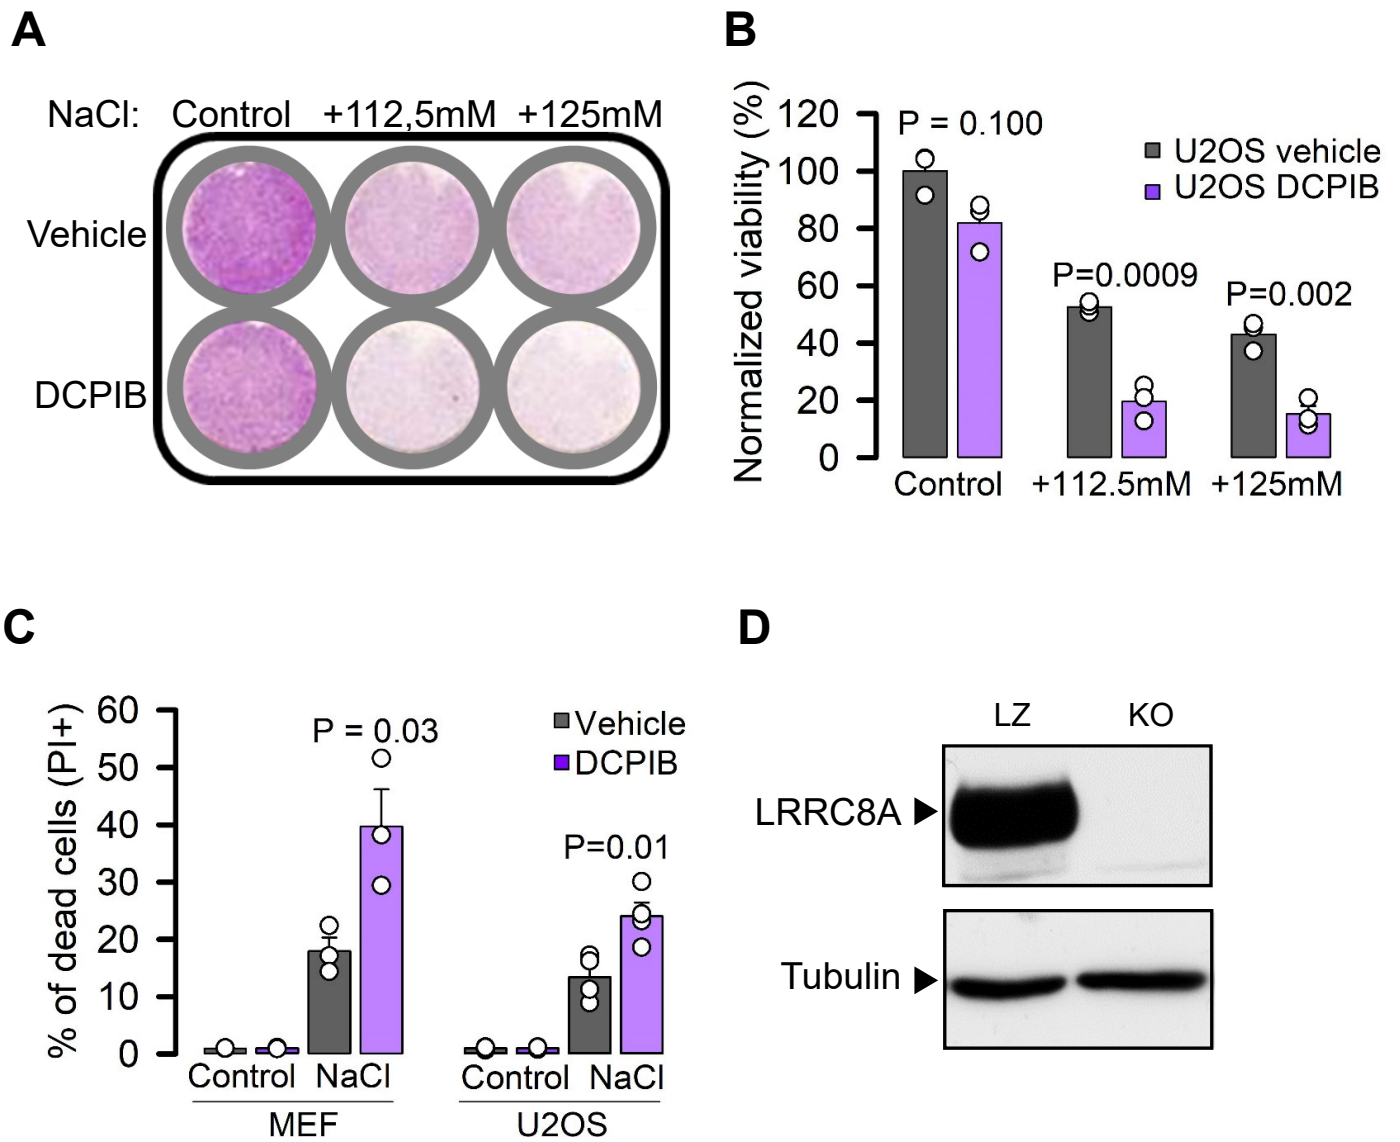

**Fig. S1. Validation of LRRC8A activity requirement for survival under hyperosmolarity in U2OS and MEF cells.** (A) Crystal violet staining of U2OS cells exposed to hypertonic conditions in the presence/absence of DCPIB. (B) Colony area quantification of crystal violet-stained U2OS cells fixed after 48 h treatment with NaCl at different concentrations in the presence/absence of DCPIB (36  $\mu$ M) (n=3). (C) PI staining (to monitor cell death) of U2OS and MEF cells treated 24 h with NaCl (137.5 mM NaCl U2OS, 150 mM NaCl MEF) and DCPIB (36  $\mu$ M) (n=3). P values shown in (b) and (c) were determined by Student's t-test. (D) Western blot analysis of LRRC8A obtained from extracts of LZ and KO cells.

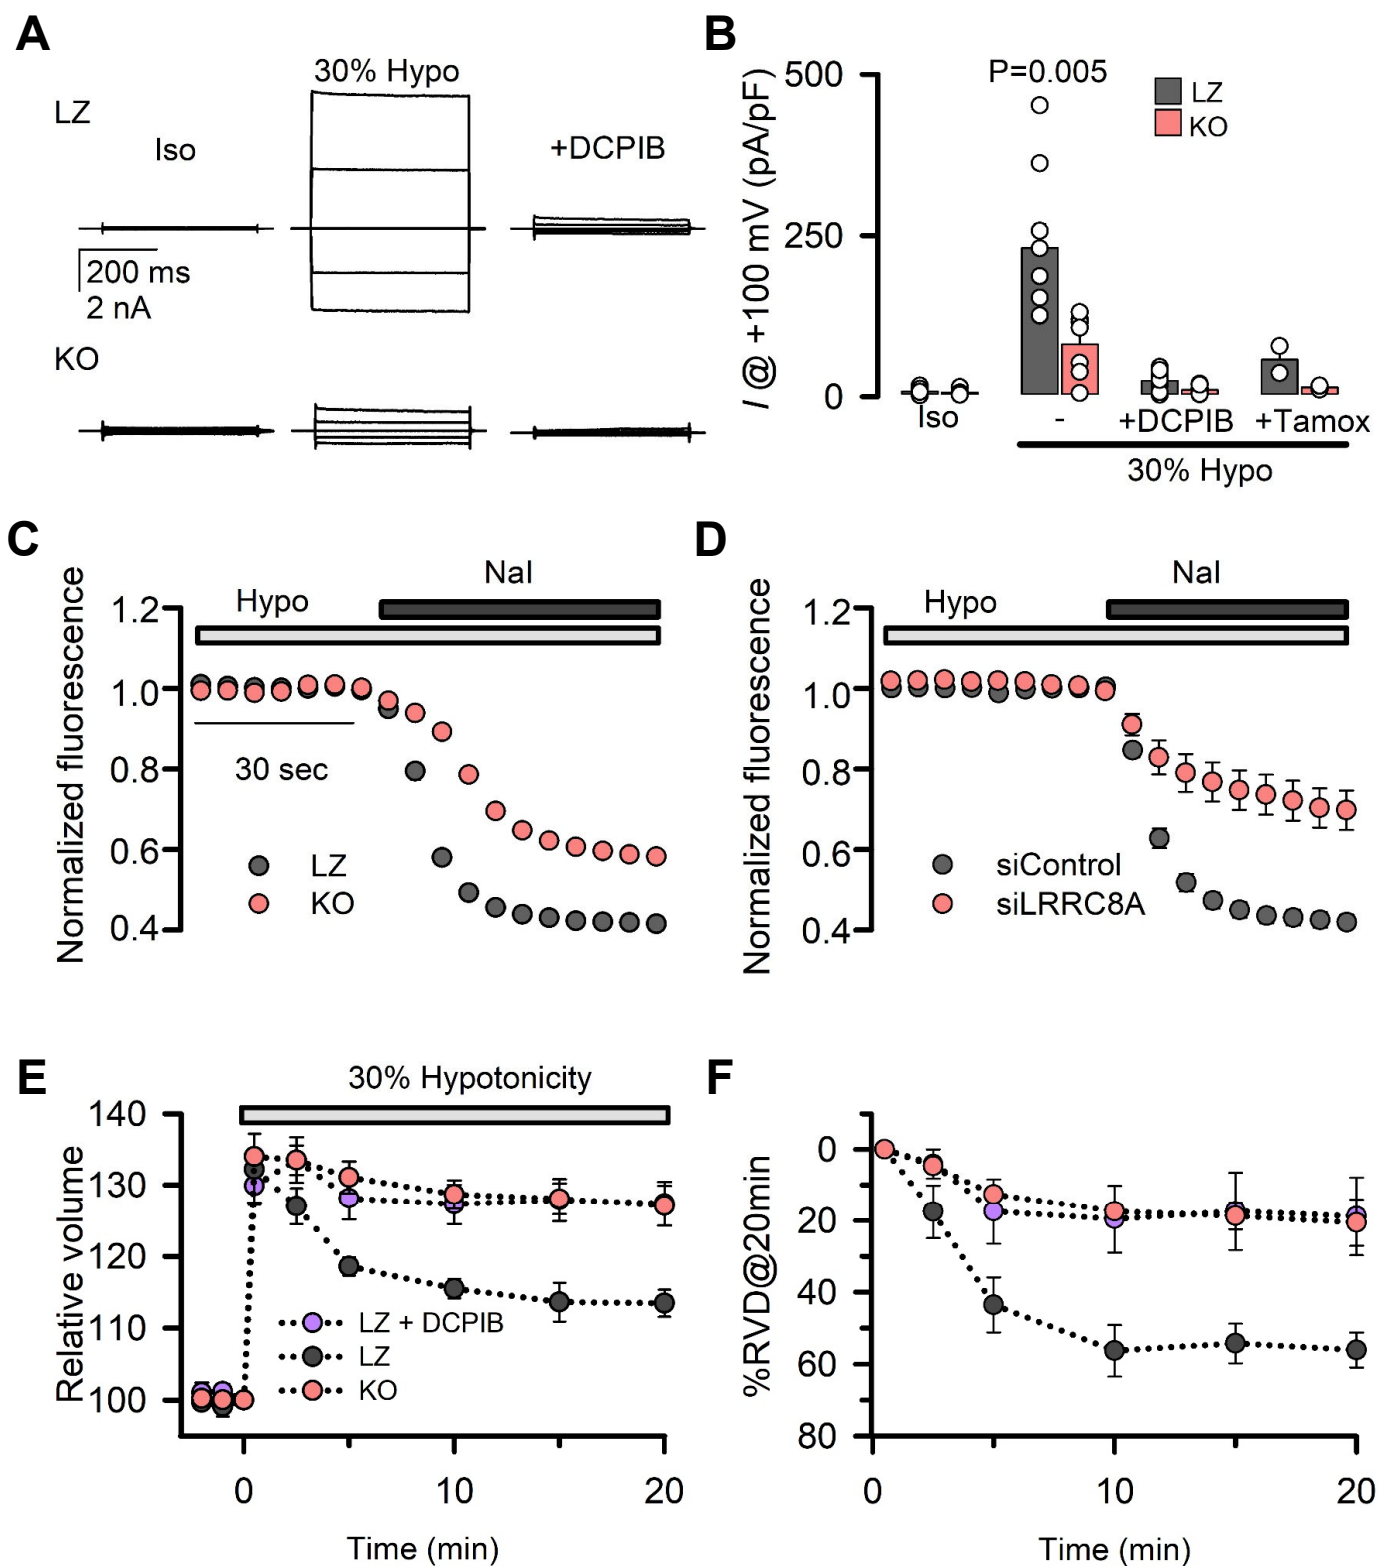

**Fig. S2. Characterization of hypotonicity-induced responses.** (A) Families of whole-cell chloride currents recorded in LZ and KO cells exposed to 30% hypotonic solutions followed by the addition of 36  $\mu$ M DCPIB. Cells here held at 0 mV and pulsed from -100 mV to +100 mV in 50 mV steps. (B) Maximal mean current densities measured in LZ and KO in isotonic and hypotonic solutions with or without adding 36  $\mu$ M DCPIB or 10  $\mu$ M tamoxifen. P values comparing KO vs LZ determined by Student's t-test. (C, D) Mean  $\pm$ SEM YFP fluorescence change (normalized to the baseline in isotonic conditions) in LZ (n=71) and KO (n=67) cells (c) or control siRNA (n=21) and siLRRc8A-treated (n=22) HeLa cells (d). Addition of hypotonic bathing solutions containing NaCl or Nal is indicated by boxes at the top of recordings. (E) Time course of relative changes in cell volume (normalized to isotonic conditions) before and after exposure of LZ and KO cells to a 30% hypotonic medium. Mean  $\pm$ SEM (n=6). (F) Percentage of RVD, calculated as the percentage of volume recovered following the initial cell swelling at the different time points after the hypotonic stress.

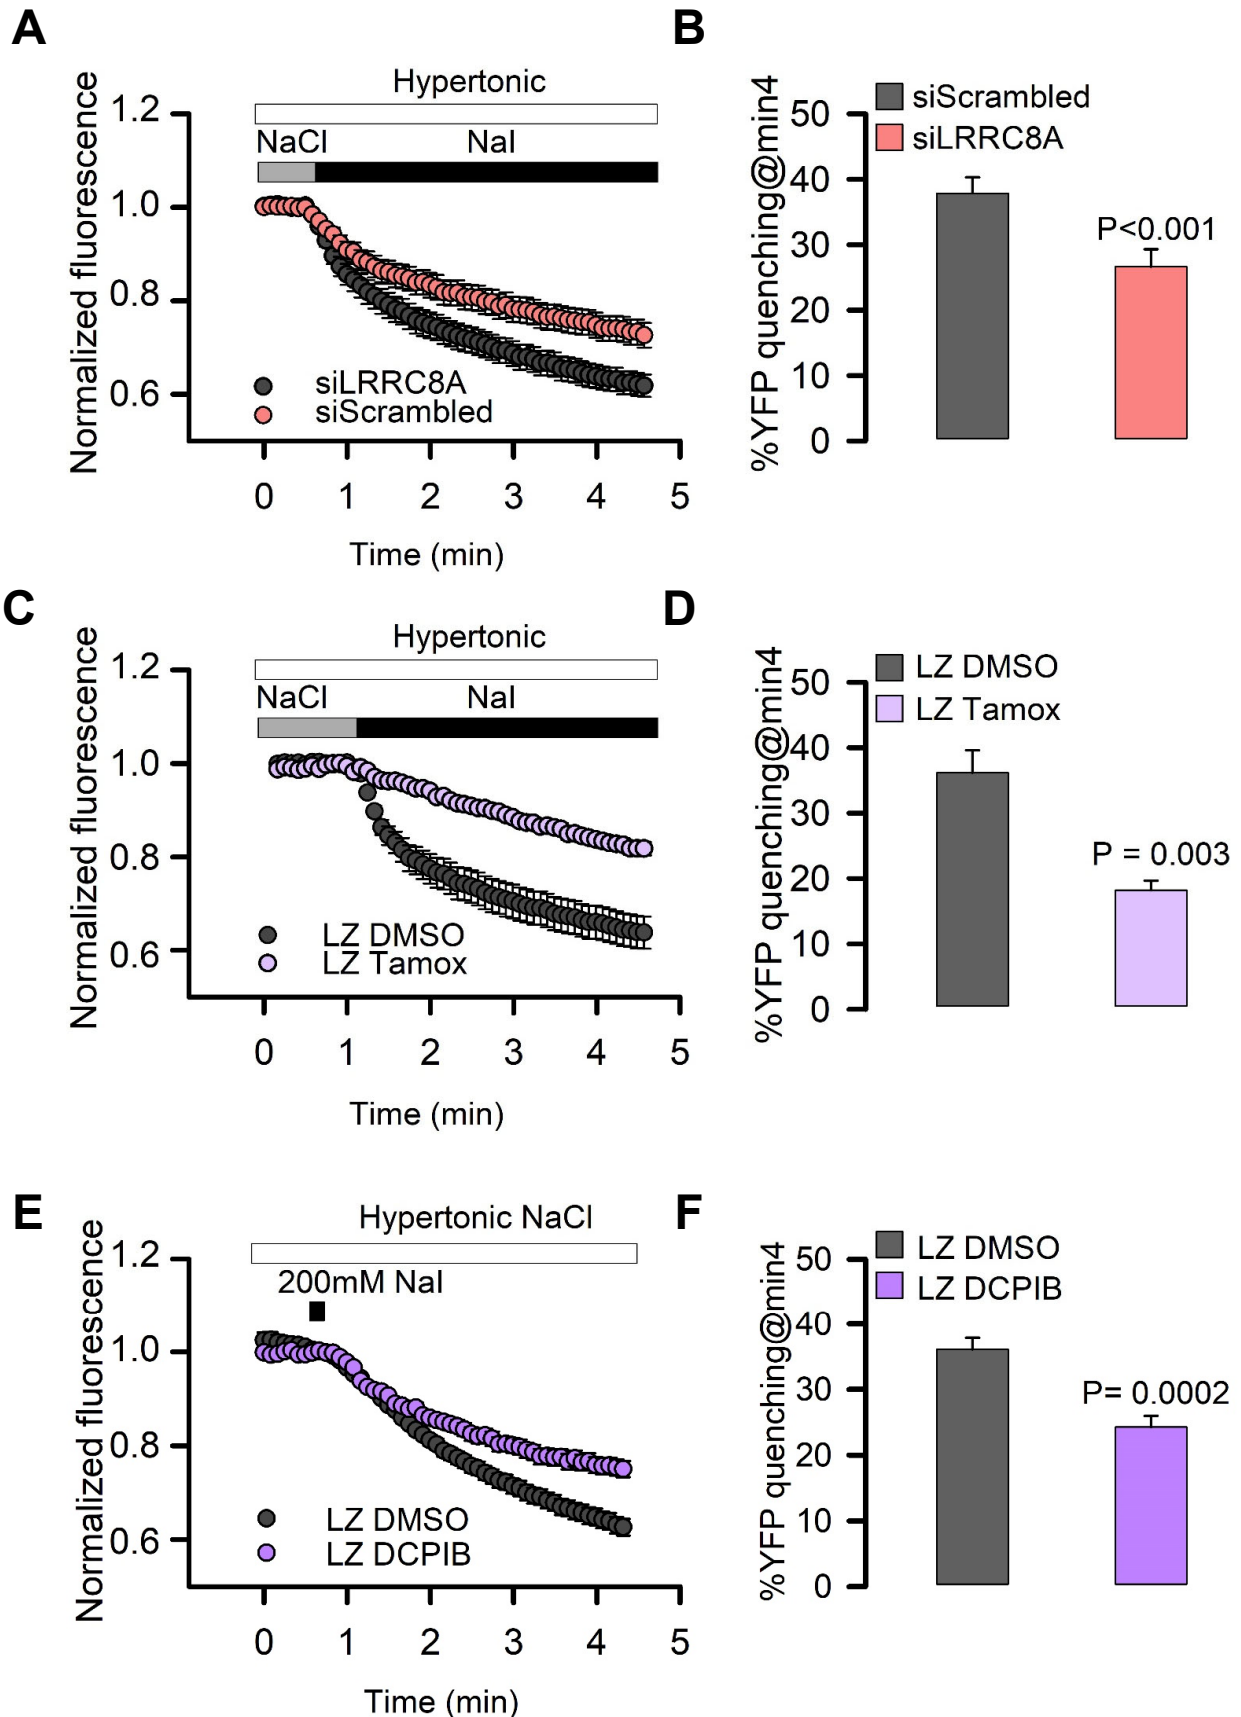

**Fig. S3. Hyperotonicity-induced YFP quenching.** (A) Mean  $\pm$  SEM YFP fluorescence change (normalized to the baseline in NaCl containing solutions). (B) Percentage of YFP quenching (right) measured 4 min after the addition of NaI in Scrambled siRNA (n=46) or LRRC8A siRNA (n=48) transfected HeLa cells also expressing the halide-sensitive YFP. (C) Mean  $\pm$  SEM YFP fluorescence change (normalized to the baseline in NaCl containing solutions). (D) Percentage of YFP quenching (right) measured 4 min after the addition of NaI in LZ cells treated with DMSO (n=51) or 10  $\mu$ M tamoxifen (n=23). (E) Mean  $\pm$  SEM YFP fluorescence change (left, normalized to the baseline in NaCl containing solutions). (F) Percentage of YFP quenching measured 4 min after the addition of NaI in LZ cells treated with DMSO (n=63) or 36  $\mu$ M DCPIB (n=26). P values determined by two-tailed Student's t-test.

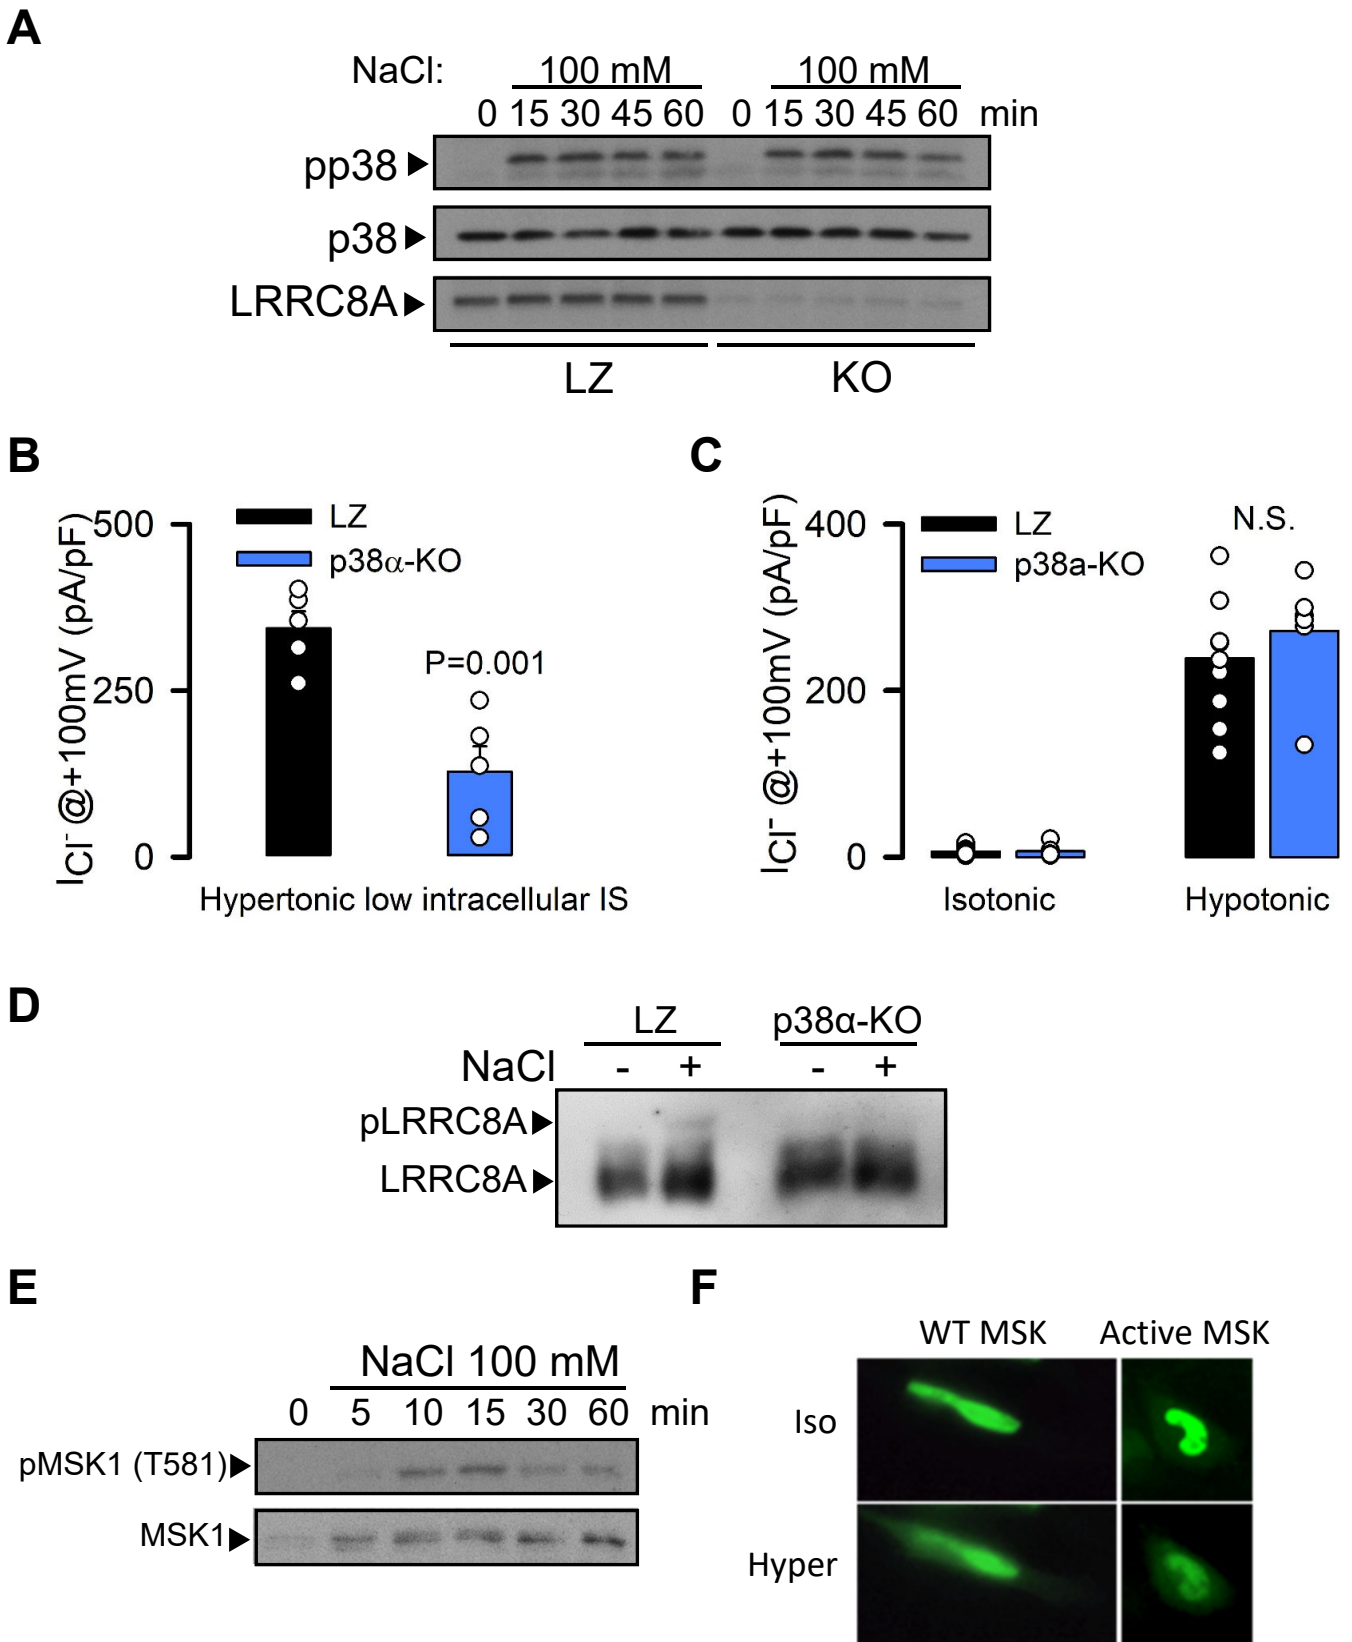

**Fig. S4. p38/MSK1 pathway modulates LRRC8A activity.** (A) Western blot analysis of p38 activation under hypertonic stress in extracts obtained from HeLa LZ and KO cells (B) Maximal mean current densities measured in LZ (n=5) and p38 $\alpha$ -KO (n=5) HeLa cells dialyzed with hypertonic solutions of 0.08 IS and exposed to hypertonic conditions. (C) Maximal mean current densities measured in LZ (n=13) and p38 $\alpha$ -KO (n=6) in isotonic and hypotonic solutions. P values determined by two-tailed Student's t-test. (D) Western blot analysis of LRRC8A in a phostag gel of extracts obtained from HeLa WT and p38 $\alpha$ -KO cells exposed to hypertonic solutions (+100 mM NaCl, 15 min) (E) Western blot analysis of MSK1 activation under hyperosmotic stress of extracts obtained from HeLa cells. (F) Immunofluorescence images showing the localization of GFP-tagged MSK1-WT and MSK1-T581D/T700D (active) under isotonic and hypertonic conditions.

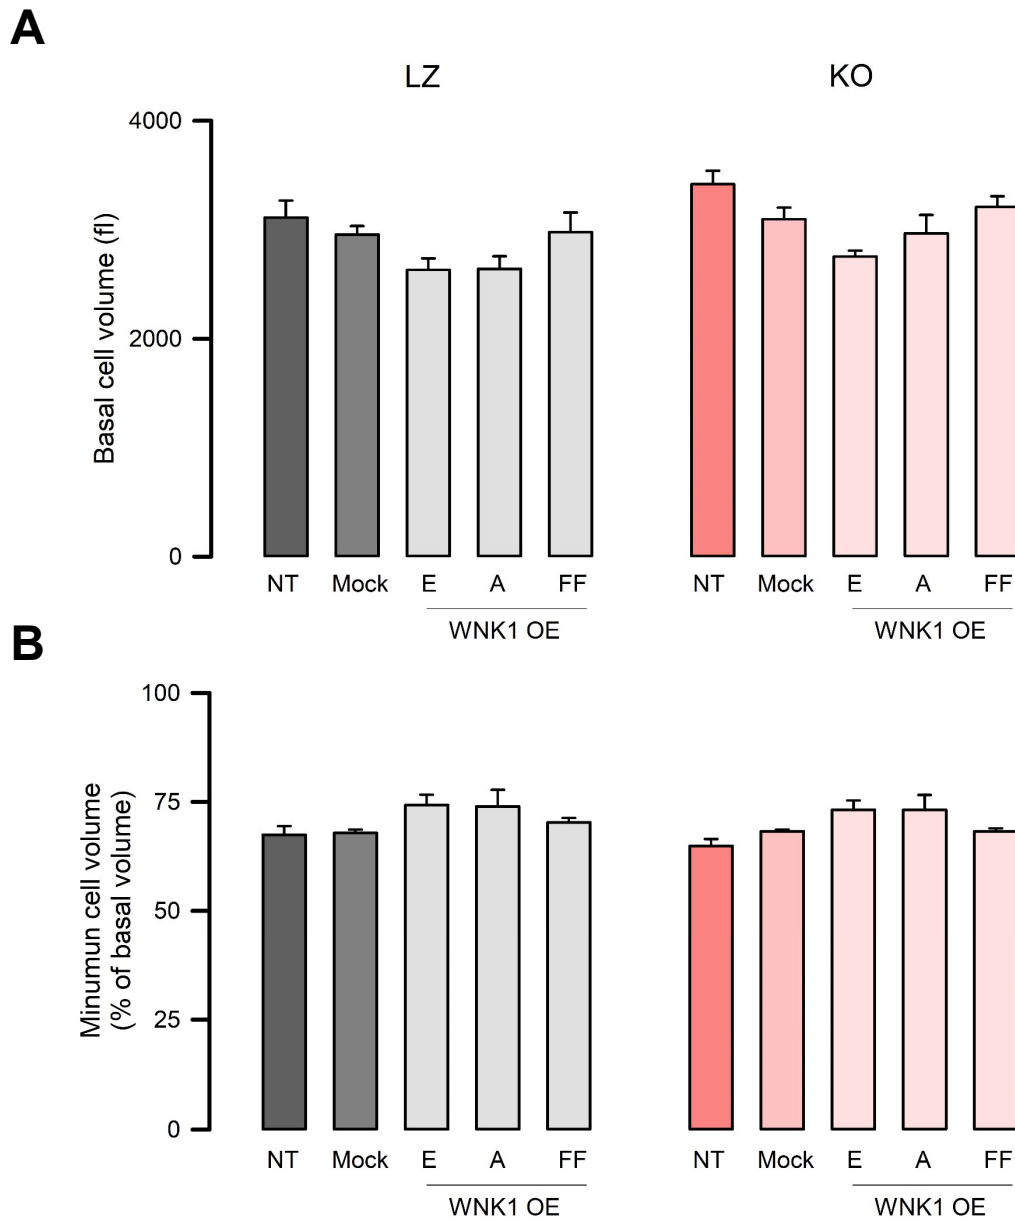

**Fig. S5. Basal cell volume and peak relative shrinkage. (A)** Basal cell volume of LZ and KO cells transiently overexpressing mock or different WNK1 plasmids. Mean  $\pm$  SEM of 6 LZ, 7 LZ mock, 5 LZ WNK1-E, 7 WNK1-A, 5 LZ WNK1-FF, 6 KO, 5 KO mock, 11 KO WNK1-E, 4 WNK1-A and 7 WNK1-FF. **(B)** Peak relative cell shrinkage of cells under the conditions described in A. No statistical differences were observed in either basal cell volume or peak shrinkage between mock transfected cells and any other condition using ANOVA followed by Dunnett's post hoc test.



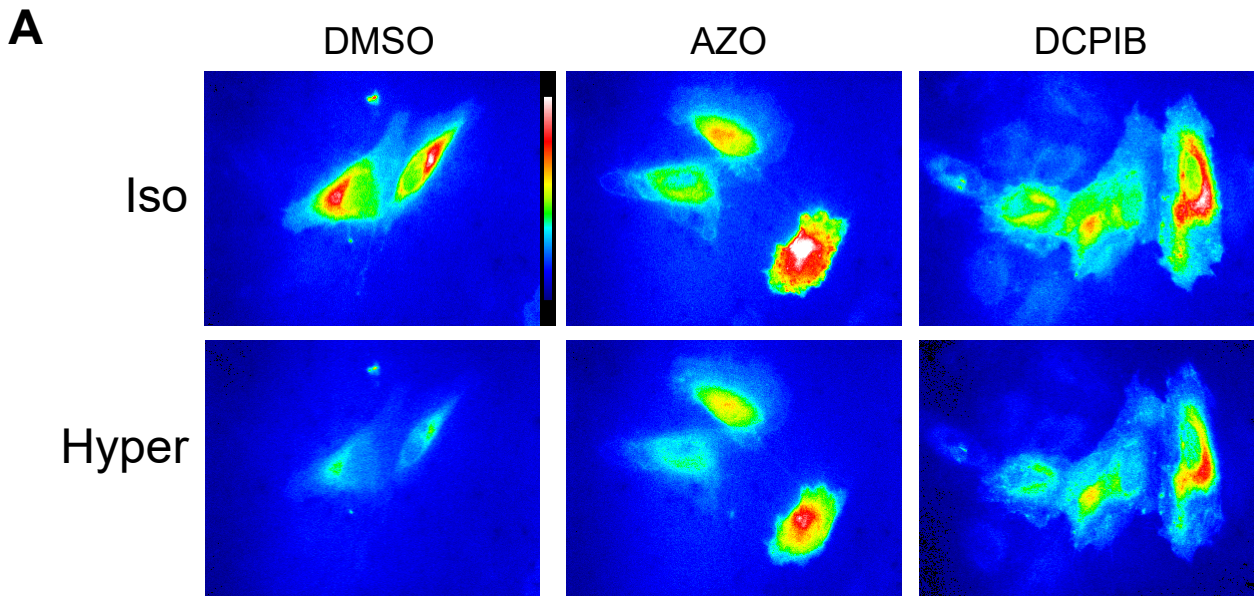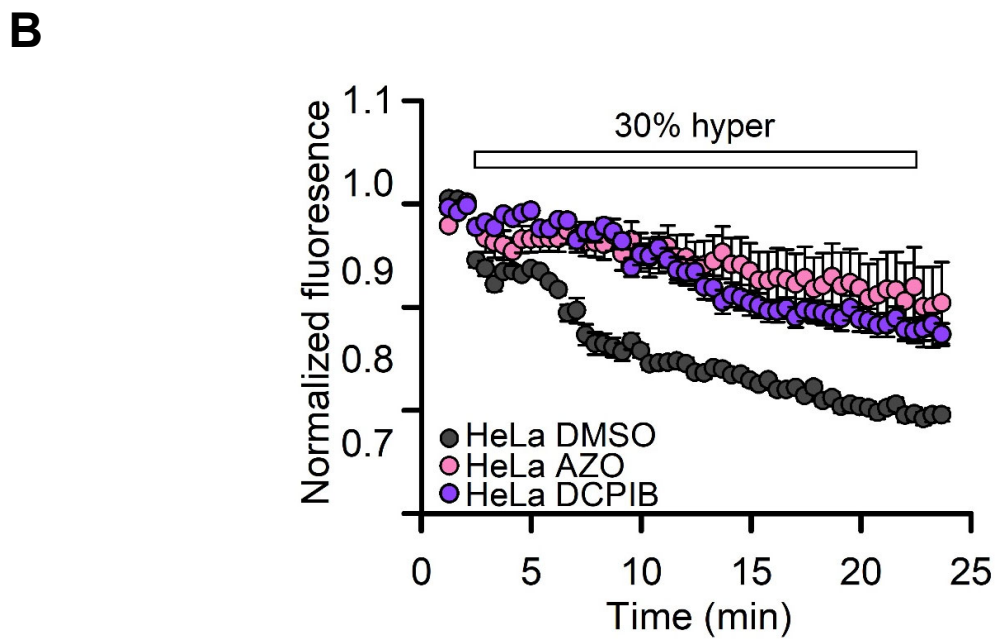

**Fig. S6. LRR8A blocker reduces NKCC1 activity.** (A) Fluorescence Images of cells transfected with YFP-tagged NKCC1 and exposed to isotonic and hypertonic solutions (30 min). Note the reduction of YFP fluorescence signal under control (DMSO) hypertonic conditions, whereas smaller reduction was observed in cells treated with 36  $\mu$ M DCPIB or the NKCC1 inhibitor, azosemide (10  $\mu$ M). (B) Mean  $\pm$ SEM YFP fluorescence change (normalized to the baseline in isotonic conditions) in NKCC1-YFP-expressing HeLa cells exposed to hypertonicity in the presence of DMSO, azosemide or DCPIB.

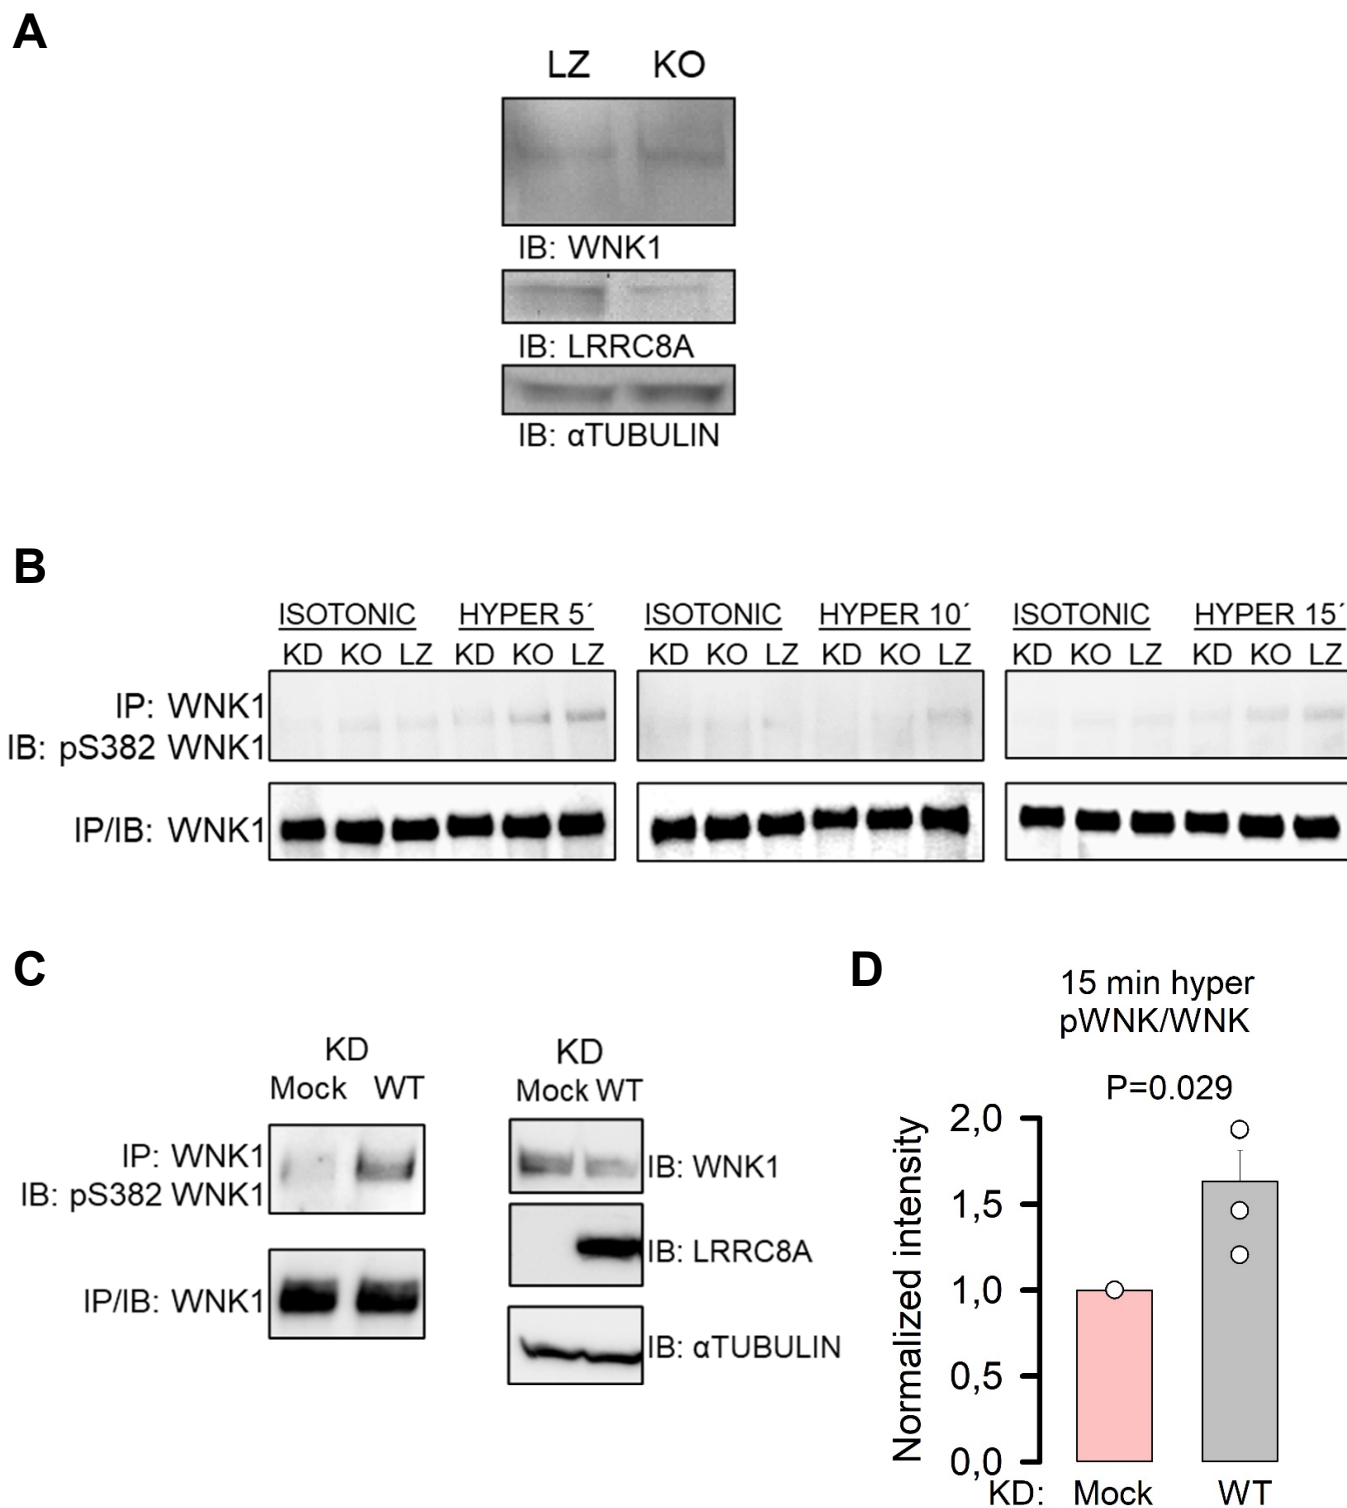

**Fig. S7. LRRC8A triggers WNK activation to promote RVI and cell survival under hypertonic conditions.** (A) Western blot of inputs corresponding to IP of Fig. 4a. (B) Phosphorylation of immunoprecipitated WNK1 obtained from cell lysates of LZ, KO and KD HeLa cells exposed to isotonicity and after 5, 10 and 15 min in 30% hypertonic medium. (C) Phosphorylation of immunoprecipitated WNK1 obtained from cell lysates of KD HeLa cells transfected with mock or shRNA-resistant LRRC8A and exposed to 30% hypertonic medium. Left, Western blot of p-S382 and total WNK1. Right, western blot of the inputs corresponding to the IP shown. (D) Quantification of phosphorylated WNK1 (normalized to total immunoprecipitated WNK1) after 15 min exposure to hypertonic medium. *P* value were determined by Mann-Whitney rank sum test (*n* = 4).



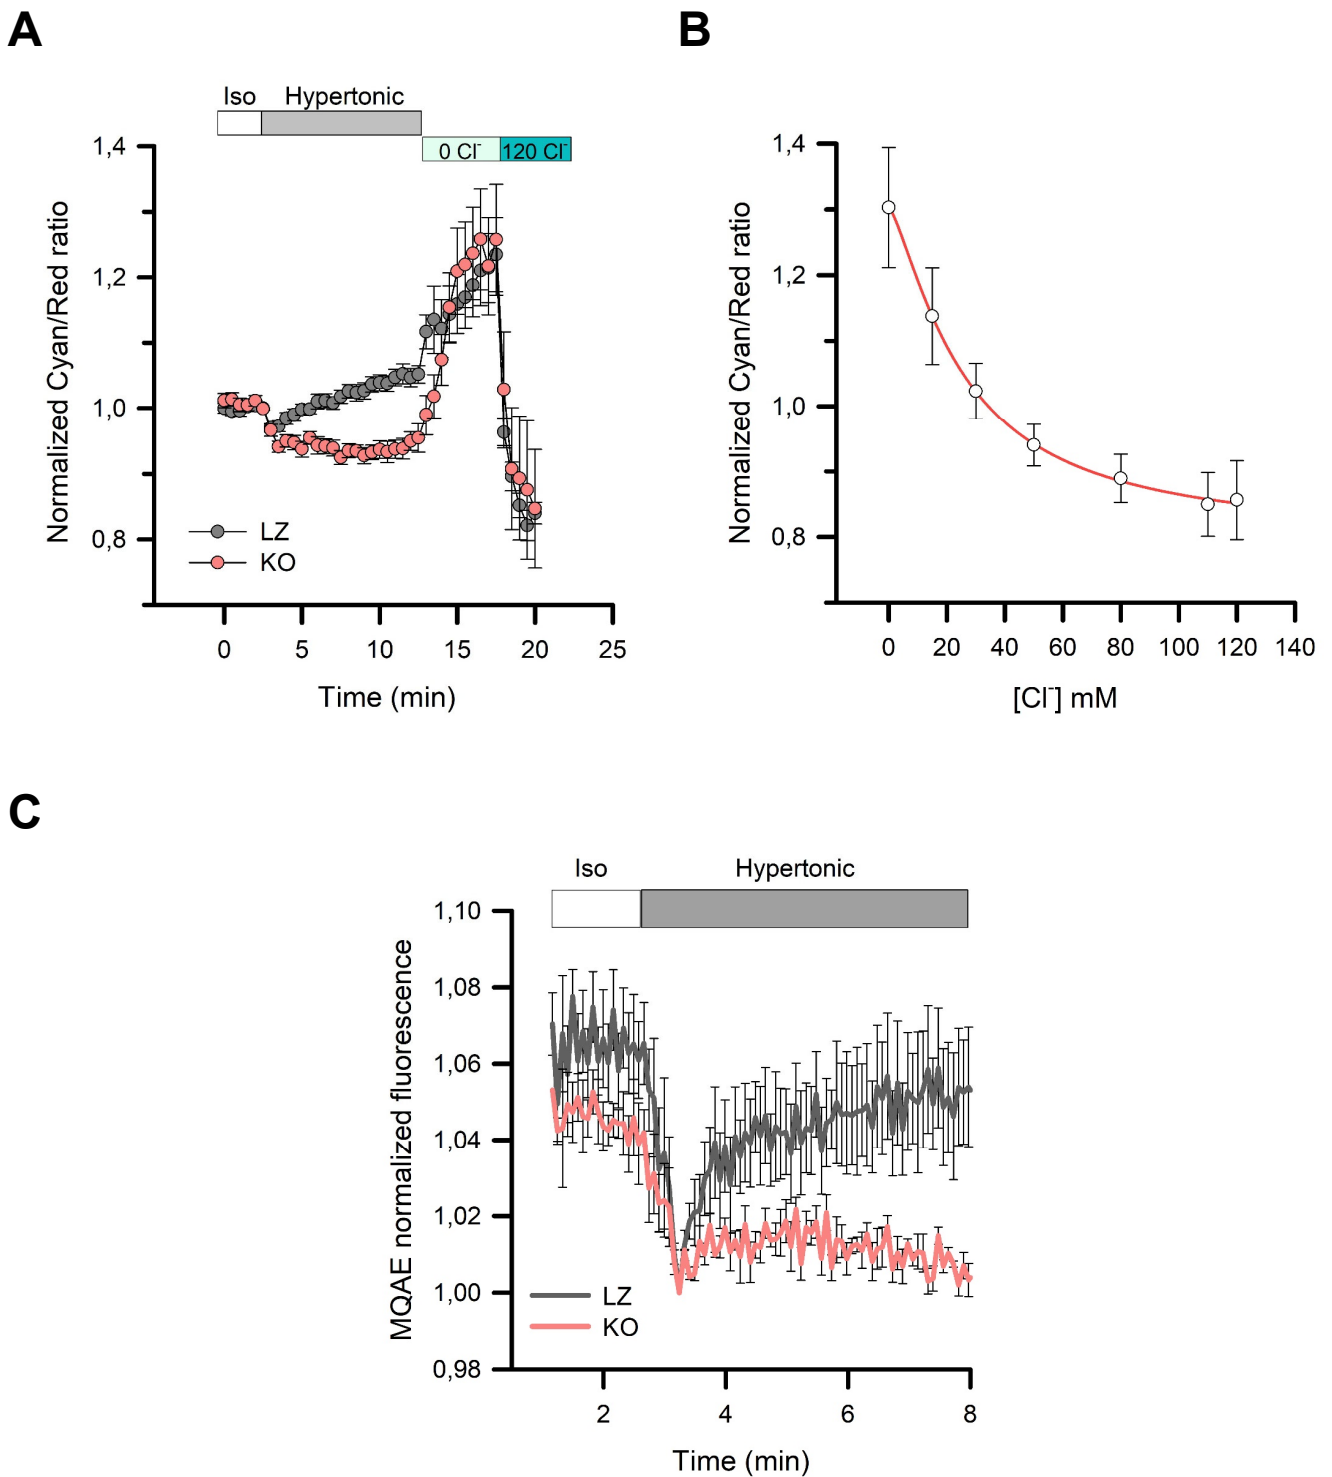

**Fig. S8. Intracellular [Cl<sup>-</sup>] in response to hypertonic conditions. (A)** Mean±SEM relative changes in intracellular Cl<sup>-</sup> concentration measured using the ClopHensor are represented as the ratio of the cyan excitation (Cl<sup>-</sup> sensitive) to red excitation (Cl<sup>-</sup> insensitive) in different intact cells. Addition of 30% hypertonic bathing solutions and calibrating solutions containing 0Cl<sup>-</sup> or 120 mM Cl<sup>-</sup> is indicated by boxes at the top of recordings. Calibration solutions contained tributyltin chloride and nigericin to permeabilize cell membrane to Cl<sup>-</sup> and equilibrate the intracellular Cl<sup>-</sup> concentration with that present in the bathing solution. LZ, n=23; KO, n=20 from two independent transfections. **(B)** Intracellular Cl<sup>-</sup> calibration of ClopHensor in LZ cells (n=7) under isotonic conditions using bathing solutions containing 0, 15, 30, 50, 80, 110 y 120 mM Cl<sup>-</sup>. Red line was drawn using a sigmoidal logistic 4 parameter function. **(C)** Intracellular [Cl<sup>-</sup>] measured in cells loaded with the Cl<sup>-</sup> probe MQAE. Normalized mean±SEM fluorescence change obtained from LZ (n=5) and KO (n=4) experiments (number of cells/experiment ≥40) exposed to 30% hypertonic solutions.

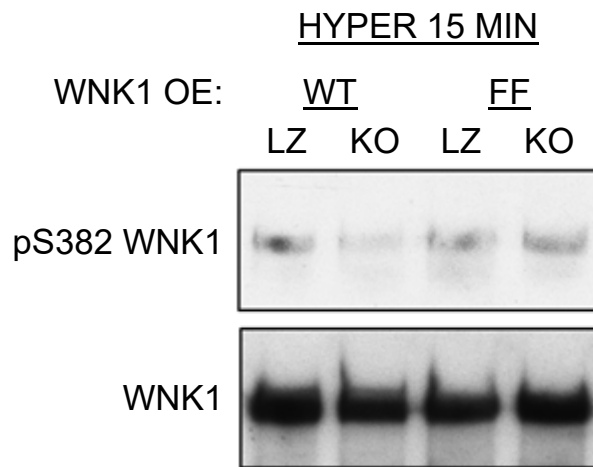

**Fig. S9. Phosphorylation of WNK1 overexpressed in LZ and KO cells.** Phosphorylation of WNK1-WT and WNK1-FF expressed in LZ and KO HeLa cells exposed to 30% hypertonic medium. Top, western blot of p-S382-WNK1; bottom, western blot of total WNK1.

**A**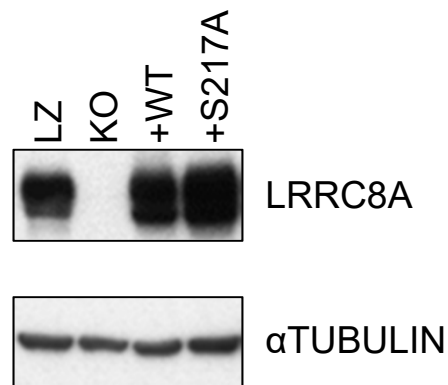**B**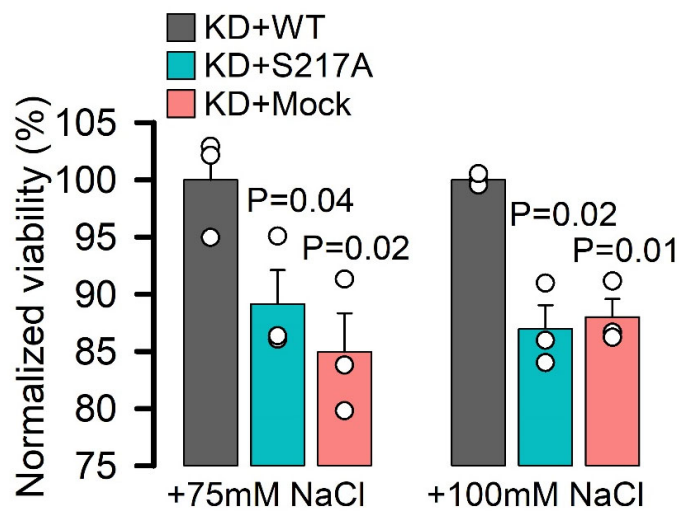

**Fig. S10. LRRC8A expression in inducible cells and cell survival. (A)** Western blot of LRRC8A in control, KO and inducible WT and S217A cell lines in the presence of 60 ng/ml doxycycline. **(B)** Crystal violet staining to monitor cell survival of KD HeLa cells overexpressing shRNA-resistant LRRC8A-WT or LRRC8A-S217A exposed to different doses of hyperosmotic stress. P values determined by ANOVA followed by Dunnett's post hoc test versus KD-WT group.

**Table S1.** Top 50 genes that are essential for cell survival upon hypertonicity identified by an unbiased loss-of-function genetic screen using the CRISPR-Cas9 system in HeLa cells.

| Gene Symbol | Gene Rank | RRA         | FDR      | Gene name                                                    |
|-------------|-----------|-------------|----------|--------------------------------------------------------------|
| LRRC8A      | 1         | 1.8692E-07  | 0.064356 | Leucine-rich repeat-containing protein 8A                    |
| AGPAT5      | 2         | 0.000014151 | 0.648515 | 1-Acylglycerol-3-Phosphate O-Acyltransferase 5               |
| CTRB1       | 3         | 0.000014276 | 0.54703  | Chymotrypsinogen B1                                          |
| CCDC85C     | 4         | 0.000033069 | 0.873762 | Coiled-Coil Domain Containing Protein 85C                    |
| AIPL1       | 5         | 0.000041066 | 0.873762 | Aryl Hydrocarbon Receptor Interacting Protein Like 1         |
| NEURL1B     | 6         | 0.000051732 | 0.873762 | Neutralized E3 Ubiquitin Protein Ligase 1B                   |
| LPIN3       | 7         | 0.000052284 | 0.873762 | Lipin 3                                                      |
| SULF2       | 8         | 0.000053273 | 0.873762 | Sulfatase 2                                                  |
| BAIAP3      | 9         | 0.000071128 | 0.873762 | Brain-Specific Angiogenesis Inhibitor I-Associated Protein 3 |
| ZNF646      | 10        | 0.000088054 | 0.873762 | Zinc Finger Protein 646                                      |
| HAP1        | 11        | 0.000090202 | 0.873762 | Huntingtin Associated Protein 1                              |
| GJC2        | 12        | 0.000099141 | 0.873762 | Gap Junction Protein Gamma 2 / Connexin-46.6                 |
| TPM1        | 13        | 0.00010278  | 0.874072 | Tropomyosin 1                                                |
| IGFBP7      | 14        | 0.00010417  | 0.874072 | Insulin Like Growth Factor Binding Protein 7                 |
| ATCAY       | 15        | 0.00013271  | 0.87698  | ATCAY Kinesin Light Chain Interacting Caytaxin               |
| CABP1       | 16        | 0.00013321  | 0.87698  | Calcium Binding Protein 1                                    |
| VCAM1       | 17        | 0.00013378  | 0.87698  | Vascular Cell Adhesion Molecule 1                            |
| CPA1        | 18        | 0.00015472  | 0.911427 | Carboxypeptidase A1                                          |
| CYP1B1      | 19        | 0.0001656   | 0.911427 | Cytochrome P450 Family 1 Subfamily B Member 1                |
| DACT3       | 20        | 0.00017027  | 0.911427 | Dishevelled Binding Antagonist Of Beta Catenin 3             |
| CCDC28B     | 21        | 0.0001713   | 0.911427 | Coiled-Coil Domain-Containing Protein 28B                    |
| EXD3        | 22        | 0.00018027  | 0.911427 | Exonuclease 3'-5' Domain Containing Protein 3                |
| PSMD10      | 23        | 0.00020496  | 0.873762 | Proteasome 26S Subunit, Non-ATPase 10                        |
| RNPEP       | 24        | 0.00021395  | 0.911427 | Arginyl Aminopeptidase                                       |
| SPTSSA      | 25        | 0.00021465  | 0.873762 | Serine Palmitoyltransferase Small Subunit A                  |
| TICAM1      | 26        | 0.00021533  | 0.911427 | Toll Like Receptor Adaptor Molecule 1                        |
| GAS2        | 27        | 0.00022022  | 0.911427 | Growth Arrest Specific 2                                     |
| MYBL2       | 28        | 0.00023073  | 0.911427 | Myb-Like Protein 2                                           |
| THSD4       | 29        | 0.00023981  | 0.911427 | Thrombospondin Type-1 Domain-Containing Protein 4            |
| HOOK2       | 30        | 0.00024476  | 0.911427 | Hook Microtubule Tethering Protein 2                         |
| NEXN        | 31        | 0.00025273  | 0.87698  | Nexilin F-Actin Binding Protein                              |
| DUSP21      | 32        | 0.00025979  | 0.911427 | Dual Specificity Phosphatase 21                              |
| SLC5A6      | 33        | 0.00029145  | 0.911427 | Solute Carrier Family 5 Member 6                             |
| LAMP2       | 34        | 0.00029688  | 0.911427 | Lysosomal Associated Membrane Protein 2                      |
| IMPAD1      | 35        | 0.00030832  | 0.911427 | Inositol Monophosphatase Domain-Containing Protein 1         |
| CRTAC1      | 36        | 0.00032536  | 0.911427 | Cartilage Acidic Protein 1                                   |

|          |    |            |          |                                              |
|----------|----|------------|----------|----------------------------------------------|
| TMEM132C | 37 | 0.00033798 | 0.911427 | Transmembrane Protein 132C                   |
| HES3     | 38 | 0.00033998 | 0.911427 | Hes Family BHLH Transcription Factor 3       |
| MXRA5    | 39 | 0.00036572 | 0.911427 | Matrix-Remodeling-Associated Protein 5       |
| HSPB6    | 40 | 0.00037682 | 0.911427 | Heat Shock Protein Beta-6                    |
| KIAA1967 | 41 | 0.00038812 | 0.911427 | Cell Cycle And Apoptosis Regulator Protein 2 |
| RGS19    | 42 | 0.00040146 | 0.911427 | Regulator Of G Protein Signaling 19          |
| SCGB3A1  | 43 | 0.00041873 | 0.911427 | Secretoglobin Family 3A Member 1             |
| CNR1     | 44 | 0.00042211 | 0.911427 | Cannabinoid Receptor 1                       |
| FKRP     | 45 | 0.00042282 | 0.911427 | Fukutin Related Protein                      |
| C3orf36  | 46 | 0.00045652 | 0.911427 | Chromosome 3 Putative Open Reading Frame 36  |
| SIL1     | 47 | 0.00046036 | 0.911427 | SIL1 Nucleotide Exchange Factor              |
| GPBP1    | 48 | 0.00046932 | 0.911427 | GC-Rich Promoter Binding Protein 1           |
| PRG2     | 49 | 0.00047606 | 0.911427 | Proteoglycan 2                               |
| ROBO4    | 50 | 0.00047644 | 0.911427 | Roundabout Guidance Receptor 4               |

**Table S2.** Drugs, antibodies, oligonucleotides and plasmids used in this work.

| DRUGS; SUPPLIER                                          | TARGET                                     | [ $\mu$ M]       | INCUBATION                                           | VEHICLE               |
|----------------------------------------------------------|--------------------------------------------|------------------|------------------------------------------------------|-----------------------|
| DCPIB; Tocris                                            | LRRC8A, inhibits                           | 37.5             | Acute (patch), preincubated 15 min (volume, imaging) | DMSO                  |
| Tamoxifen; Sigma                                         | LRRC8A, inhibits                           | 10               | Acute (patch), preincubated 15 min (imaging)         | Ethanol               |
| SB203580; Calbiochem                                     | p38, inhibits                              | 10               | Preincubated 45-60 min (patch, volume)               | DMSO                  |
| SB747651A; Tocris                                        | MSK1/2, inhibits                           | 10               | Preincubated 45-60 min (patch, volume)               | DMSO/H <sub>2</sub> O |
| Bumetanide; Sigma                                        | NKCC1, inhibits                            | 50               | Preincubated 30 min (volume)                         | DMSO                  |
| Azosemide; TRC                                           | NKCC1, inhibits                            | 25               | Preincubated 30 min (volume)                         | DMSO                  |
| 6-methoxyquinolyl) acetoethyl ester (MQAE); ThermoFisher | [Cl <sup>-</sup> ] fluorescent probe       | 5000             | 60 min                                               | DMSO                  |
| Tributyltin chloride; Sigma                              | Cl <sup>-</sup> /OH <sup>-</sup> ionophore | 10               | acute                                                | DMSO                  |
| Nigericin; ThermoFisher                                  | K <sup>+</sup> /H <sup>+</sup> exchange    | 5                | acute                                                | methanol              |
| ANTIBODIES                                               | REFERENCE                                  | [ $\mu$ M]       |                                                      |                       |
| Rabbit polyclonal anti-LRRC8A                            | #A304-175A-M Bethyl (Bionova)              | 1:1000 (5% BSA)  |                                                      |                       |
| Mouse monoclonal anti-LRRC8A                             | SAB1412855-100U Sigma                      | 1:1000 (5% BSA)  |                                                      |                       |
| Anti-p38 $\alpha$                                        | #9228 Cell signaling                       | 1:1000 (5% BSA)  |                                                      |                       |
| Anti-phospho-p38 $\alpha$                                | #9215 Cell signaling                       | 1:1000 (5% BSA)  |                                                      |                       |
| anti-MSK1                                                | #3489 Cell signaling                       | 1:1000 (5% BSA)  |                                                      |                       |
| anti-phospho-MSK1 (Thr581)                               | #9595 Cell signaling                       | 1:1000 (5% BSA)  |                                                      |                       |
| Mouse monoclonal anti- $\alpha$ -tubulin                 | #T6074 (Sigma)                             | 1:5000 (5% MILK) |                                                      |                       |

|                                                      |                                                                                                                            |                                                                                                               |
|------------------------------------------------------|----------------------------------------------------------------------------------------------------------------------------|---------------------------------------------------------------------------------------------------------------|
| Sheep anti-WNK1 total                                | S650C<br><a href="https://mrcppureagents.dundee.ac.uk/">https://mrcppureagents.dundee.ac.uk/</a>                           | 1-2 µg/ml (5% MILK)                                                                                           |
| Sheep anti-pS382-WNK1                                | S099B<br><a href="https://mrcppureagents.dundee.ac.uk/">https://mrcppureagents.dundee.ac.uk/</a>                           | 2 µg/ml (5% MILK) incubated in the presence of 10 µg/ml of a dephosphorylated form of phosphopeptide antigen. |
| Secondary anti-rabbit HRP                            | NA934, GE healthcare                                                                                                       | 1:2000 (5% MILK)                                                                                              |
| Secondary anti-mouse HRP                             | NXA931, GE healthcare                                                                                                      | 1:5000-1:10000 (5% MILK)                                                                                      |
| Secondary anti-sheep HRP                             | #31480, Invitrogen                                                                                                         | 1:5000-1:10000 (5% MILK)                                                                                      |
| <b>PLASMIDS</b>                                      | <b>REFERENCE</b>                                                                                                           |                                                                                                               |
| SWELL1-pIRES2-EGFP-RNAi-Resistant WT                 | Provided by Dr. A. Patapoutian (The Scripps Research Institute, La Jolla, USA)                                             |                                                                                                               |
| pcDNA3.1-EYFP-H148Q/I152L                            | Provided by Dr. L. Galletta (University of Naples Federico II, Naples, Italy.)                                             |                                                                                                               |
| pEGFP-C2-MSK1 T581/D+T700D                           | DU6268<br><a href="https://mrcppureagents.dundee.ac.uk/">https://mrcppureagents.dundee.ac.uk/</a>                          |                                                                                                               |
| pEGFP-C1-FLAG-MSK1- WT                               | DU6445<br><a href="https://mrcppureagents.dundee.ac.uk/">https://mrcppureagents.dundee.ac.uk/</a>                          |                                                                                                               |
| pEBG-2T-FLAG-GST full WNK1-S382/E                    | DU6851<br><a href="https://mrcppureagents.dundee.ac.uk/">https://mrcppureagents.dundee.ac.uk/</a>                          |                                                                                                               |
| pEBG-2T- FLAG-GST full WNK1-S382/A                   | DU6850<br><a href="https://mrcppureagents.dundee.ac.uk/">https://mrcppureagents.dundee.ac.uk/</a>                          |                                                                                                               |
| pEBG FLAG GST GST WNK1-L369F /L371F                  | Generated from plasmid DU687008<br><a href="https://mrcppureagents.dundee.ac.uk/">https://mrcppureagents.dundee.ac.uk/</a> |                                                                                                               |
| pEBG FLAG GST WNK1-WT                                | DU562119<br><a href="https://mrcppureagents.dundee.ac.uk/">https://mrcppureagents.dundee.ac.uk/</a>                        |                                                                                                               |
| pcDNA3.1 Flag Cl-sensitive YFP hNKCC1 WT (NT13)      | #49060<br>Addgene                                                                                                          |                                                                                                               |
| pcDNA3.1ClpHensor                                    | Provided by Dr. P. Bregestovski (Inserm UMR1106, Aix-Marseille University, Marseille, France)                              |                                                                                                               |
| <b>MOLECULAR BIOLOGY TOOLS</b>                       | <b>REFERENCE</b>                                                                                                           | <b>TARGET SEQUENCE</b>                                                                                        |
| siRNA LRRC8A                                         | Dharmacon (Cat#J-026211-09-0020)                                                                                           | GGUACAACCAUCGCCUA                                                                                             |
| <b>OLIGONULEOTIDES</b>                               | <b>SEQUENCE</b>                                                                                                            |                                                                                                               |
| <b>gRNA sequence targets</b>                         |                                                                                                                            |                                                                                                               |
| LacZ-fwd                                             | ACCGCCCGAATCTCTATCGTGCGG                                                                                                   |                                                                                                               |
| LacZ-rvs                                             | AAACCCGCACGATAGAGATTCGGG                                                                                                   |                                                                                                               |
| LRRC8A-SC-GD1-fwd                                    | ACCGTGTGTTTGACCTGGTGGAGC                                                                                                   |                                                                                                               |
| LRRC8A-SC-GD1-rvs                                    | AAACGCTCCACCAGGTCAAACACA                                                                                                   |                                                                                                               |
| LRRC8A-SC-GD2-fwd                                    | ACCGAGCCGCTCCTTCACCTCGGG                                                                                                   |                                                                                                               |
| LRRC8A-SC-GD2-rvs                                    | AAACCCCGAGGTGAAGGAGCGGCT                                                                                                   |                                                                                                               |
| p38α -fwd                                            | ACCGAGCTCCTGCCGGTAGAACGT                                                                                                   |                                                                                                               |
| p38α-rvs                                             | AAACACGTTCTACCGGCAGGAGCT                                                                                                   |                                                                                                               |
| <b>MSK1 putative phosphorylation sites in LRRC8A</b> |                                                                                                                            |                                                                                                               |
| S151A                                                | GCG CAC CAG CGC GAA GCT GGA GC                                                                                             |                                                                                                               |
|                                                      | GGG AAT TTGA ACC AGA AGT TGC TGC AGG                                                                                       |                                                                                                               |
| S174A                                                | GAG GGC CCT GGC GGA GAC AGT GG                                                                                             |                                                                                                               |
|                                                      | GTG GTC CAG GGC GAG TCG AAG                                                                                                |                                                                                                               |



|                                             |                                                 |
|---------------------------------------------|-------------------------------------------------|
| S217A                                       | GCG GAC CAA GGC ACG GAT CGA GC                  |
|                                             | TGC AGC ATG GGC ACG GTG                         |
| S217E                                       | GCG GAC CAA GGA ACG GAT CGA GCA G               |
|                                             | TGC AGC ATG GGC ACG GTG                         |
| T229A                                       | CCG CTC AGA GGC GGG CGT GCT GG                  |
|                                             | TCC ACG ATA CCC TGC TCG ATC CGT G               |
| <b>LRRC8A ICL loop fragment - pGEX-6P-1</b> |                                                 |
|                                             | ATG AAT TCA AAT TCC CGC GCA CCA GCT CGA         |
|                                             | ATG CGG CCG CGT CCC CCT CCT CCA CAT GGG TC      |
| <b>LRRC8A full length - pGEX-6P-1</b>       |                                                 |
|                                             | ATG AAT TCA TGG AAC AAA AAC TTA TTT CTG AAG AAG |
|                                             | ATC TGA TTC CGG TGA CAG AGC TCC GCT ACT TTG CG  |
|                                             | ATG CGG CCG CTC AGG CCT GCT CCT TGT CAG CC      |
| <b>MSK1 - pETM11</b>                        |                                                 |
|                                             | ATA TAT CCA TGG CGA GGA GGA GGG TGG CAG CAG     |
|                                             | CG                                              |
|                                             | ATA TAT GCG GCC GCA GCT ACT GAG TCC GAG AAC TG  |
| <b>LRRC8A - pSB-BN</b>                      |                                                 |
|                                             | AAT ATG GCC TCT GAG GCC ACC ATG ATT CCG GTG     |
|                                             | ACA GAG CTC CG                                  |
|                                             | AAT ATG GCC TGA CAG GCC TCA GGC CTG CTC CTT     |
|                                             | GTC AGC CCT CCA TAA TCT TTC TTT TAC TTC AGG TGG |
|                                             | CAG TGT G                                       |

**Table S3.** Quality control of the screening. Gene Set Enrichment Analysis (GSEA) of KEGG pathways of MAGeCK ranked genes for two independent comparisons. Essential genes are depleted eight days after the establishment of the sgRNA library infection. Gene Set Enrichment Analysis (GSEA) of KEGG pathways of MAGeCK ranked genes for two independent comparisons. Control sheet: Day 8 control samples compared to Day 0; NaCl sheet: Day 8 NaCl treated samples compared to Day 0. Pathway is the KEGG category name. Size is the total number of genes in this pathway. ES is the Enrichment Score of the GSEA. p is the p-value calculated by GSEA. p\_permutation is the p-value calculated by permutation test. FDR correction of the p-value. Ranking is the order of the pathways based on the ES. Hits are the number of genes below the considered cutoff.

See in <https://figshare.com/s/647e734e484ca4e8685b>

**Table S4.** MAGeCK results for hyperosmotic stress screening analysis. Identification of fitness genes done with MAGeCK's "test" command. Id is the HGNC gene symbol. Gene\_Description is the WikiGene description of the gene. Num is the total number of sgRNAs targeting the gene. Neg.score is the RRA score. Neg.p.value is the p-value computed by MAGeCK's permutation algorithm. Neg.fdr is the FDR multiple testing correction computed from p-values. Neg.rank is the ranking of the gene according to RRA. Neg.goodsgrna is the number of sgRNAs that pass the FDR threshold for gene testing (default 0.25). neg.lfc is the gene log fold change (lfc) computed as the average of sgRNAs lfc.

See in <https://figshare.com/s/6c1d4631a16847d09bf3>
